# Supplementary material for: The Two Domains of the Avian Double-β-Defensin AvBD11 Have Different Ancestors, Common with Potential Monodomain Crocodile and Turtle Defensins
Source: MDPI journal article supplement (doi:10.3390/biology11050690), 2022-04-30
Supplement: s1 [file s1]

**Table S2. List of protein sequences used for the construction of multiple sequence alignments (MSAs) and phylogenetic trees.**

| Protein name (used in this study) | Protein sequence                                           | Source(s)                      |
|-----------------------------------|------------------------------------------------------------|--------------------------------|
| AvBD1_GALGA                       | GRKSDCFRKSGFCAFLKCPSLTLISGKCSRFLYLCKKRIWG                  | Cheng et al, 2015              |
| AvBD1_ANAPL                       | RNKEKCHREKGFGLKCSFPFIISGKCSRFFFCCKNSWRE                    | Cheng et al, 2015              |
| AvBD1.1_NIPNI                     | ENEGQCKQEGGFCSFLKCYHPYHVFGRCSTFMVCKKR                      | Cheng et al, 2015              |
| AvBD1.2_NIPNI                     | GNKEQCHRQKGHCALLVCQFPLIAIGKCSRFFFCCKPIWG                   | Cheng et al, 2015              |
| AvBD1.1_TAEGU                     | TNKEQCEQENGQCSFLKCYFPYGIAGKCSRFFFCCKEMWVG                  | Cheng et al, 2015              |
| AvBD1.2_TAEGU                     | NNKKQCEREKGYCSIFNCSFPYIIAGKCSRFFFCCKMWG                    | Cheng et al, 2015              |
| AvBD1.3_TAEGU                     | TTKEQCQRENGYCGFLKCKYFPVIGKCSRFFFCCKNVWG                    | Cheng et al, 2015              |
| AvBD2_GALGA                       | RDMLFCKGGSCHFGGCPSHLIKVGSCFGFRSCCKWPWNA                    | Cheng et al, 2015              |
| AvBD2_ANAPL                       | RDMFLCRKGSCHFGRCPIHLVRVSGCFGFRSCCKLPWDV                    | Cheng et al, 2015              |
| AvBD2_NIPNI                       | RDMFLCRKGSCHFGRCPFHLVKVGSCFGFRSCCKDPWNA                    | Cheng et al, 2015              |
| AvBD2_TAEGU                       | REMFLCRGGSCHFGGCPHILIKVGRCFGFRSCCKSPWNVKEVDEPFIEE          | Cheng et al, 2015              |
| AvBD3_GALGA                       | ATQCRIRGGFCRVGSCRFPHIAIGKCATFISCCGRAYEVDALNSVRTSPWLLAPGNPH | Cheng et al, 2015              |
| AvBD3.1_ANAPL                     | SVLCRIRGGRCRVGSCHFPERHIGRCSGFGACCI RTWG                    | Cheng et al, 2015              |
| AvBD3.2_ANAPL                     | HQACRRRGGFCTFGRCRFPTRPVGRCSTLVPCCRSTWG                     | Cheng et al, 2015              |
| AvBD3.3_ANAPL                     | RQACRQRGGICTFARCRFPPTPIGRCTSTAVPCCCK                       | Cheng et al, 2015              |
| AvBD3.4_ANAPL                     | DIRCTIEGGRCRFGGCGFAEKQIGKCYRIVPCCS                         | Cheng et al, 2015              |
| AvBD3.5_ANAPL                     | TLRCRRRGGICRFGNCLFPERHIGRCSGFQPCCSRIFG                     | Cheng et al, 2015              |
| AvBD3.6_ANAPL                     | SWLCVRRGGNCRFGRCQFAERQIGRCSAFQPCCGRTWG                     | Cheng et al, 2015              |
| AvBD3_NIPNI                       | PFRCIQRGGYCSFGDCRYPARSIGRCSRFGQCCCKNIWG                    | Cheng et al, 2015              |
| AvBD3.1_TAEGU                     | HDKCVRRGGFCFVGGCRFPYKYVGVCSALSHCCCKPIWG                    | Cheng et al, 2015              |
| AvBD3.2_TAEGU                     | AVTCWRKQGFCAWRSCPRGARVVGICSPRMLCCK                         | Cheng et al, 2015              |
| AvBD3.3_TAEGU                     | PLLCRQRGGFCTFGGCRFPSTPIGRCSAVQTCCCKSVWG                    | Cheng et al, 2015              |
| AvBD3.4_TAEGU                     | PLLCRRRGGYCTLGICRHGATPVGRCTPYRVCLGGWV                      | Cheng et al, 2015              |
| AvBD3.5_TAEGU                     | PDQCRRLRGFCFRRSCPRGSAVPGRCARGIACCKIVWG                     | Cheng et al, 2015              |
| AvBD3.6_TAEGU                     | SARCRRRGGFCSDGCSGPSKPIGKCSAVSVCCCKSRWV                     | Cheng et al, 2015              |
| AvBD3.7_TAEGU                     | PLLCRQRGGFCTFGGCRFPSTPIGRCSAVQTCCCKSHWV                    | Cheng et al, 2015              |
| AvBD3.8_TAEGU                     | AVTCWRKQGFCAWRSCPRGTHVVGICSPGMLCCKRLKP                     | Cheng et al, 2015              |
| AvBD3.9_TAEGU                     | CRQRRGGYCTYGRCNFPARPIGRCTLYSVCCRR                          | Cheng et al, 2015              |
| AvBD4_GALGA                       | RYHMQCGYRGTFCTPGKCPYGNAYLGLCRPKYSSCCRWL                    | Cheng et al, 2015              |
| AvBD4_NIPNI                       | KPFMRRCGYRGTFCTPGMCPRGNAYLGVCRSGHSCCKWL                    | Cheng et al, 2015              |
| AvBD4_TAEGU                       | RPYMQCGYRGTFCHKGKCPRGNYYLGPCRSGYSSCCRWL                    | Cheng et al, 2015              |
| AvBD4_ANAPL                       | KHLMRCGYRGTFCTPGKCPRGNAYLGRCRAGHSCCKWL                     | Cheng et al, 2015              |
| AvBD5_GALGA                       | GLPQDCERRGGFCSHRSCPPGIGRIGLCSKEDFCCRRSRWYS                 | Cheng et al, 2015              |
| AvBD5_NIPNI                       | GLPQDCERRGGFCSHGSCPPGIGRIGLCSKEDFCCRRRWYP                  | Cheng et al, 2015              |
| AvBD5_TAEGU                       | ASAQDCERRGGFCSHRSCPPGIGRIGLCSKEDFCCRRRWYP                  | Cheng et al, 2015              |
| AvBD5_ANAPL                       | GSPQDCERRGGFCSHRSCPPGIGRIGLCSKEDFCCRRRWYP                  | Cheng et al, 2015              |
| AvBD6_GALGA                       | SPIHACRYQRGVCPGRCRWYYPYRVGSCGSLKSCCVNRNWA                  | Cheng et al, 2015              |
| AvBD7_GALGA                       | RPIDTCRLRNGICFPGICRRPYWIGTCNNGIGSCCARGWRS                  | Cheng et al, 2015              |
| AvBD7_NIPNI                       | EPHHPICFQKGHCFPGICRRPYWIGTCNNGYSCCKRGWRS                   | Cheng et al, 2015              |
| AvBD7_TAEGU                       | RLNNPCLMQNGLCFRGICRRPYWIGTCNNGYSCCKRGWRS                   | Cheng et al, 2015              |
| AvBD7_ANAPL                       | RPTDPCVLQNLGCFPGICRRPYWVGTCNNGSGCCVKGWRH                   | Cheng et al, 2015              |
| AvBD8_GALGA                       | NNEAQCEQAGGICSDHCFHLHTRAFGHQCRGVPCCRVTYD                   | Cheng et al, 2015              |
| AvBD8_NIPNI                       | NNDVQCKQAGGTCTSTHCNLPNTRSFGRCCQGVPCCRVTYD                  | Cheng et al, 2015              |
| AvBD8_TAEGU                       | NTEVQCRQAGGVCSSDRCPPHTRPFGRCQQGIPCCRTYD                    | Cheng et al, 2015              |
| AvBD8_ANAPL                       | NNAVQCKQAGGTCTSTHCPPNTRAFGRCKQGIPCCRTYD                    | Cheng et al, 2015              |
| AvBD9_GALGA                       | ADTLACRQSHGSCSFVACRAPSVDIGTCRGGKLCCKWAPSS                  | Cheng et al, 2015              |
| AvBD9_NIPNI                       | ADTLACRQNRGSCSFVACTSPLVDIGTCRGGKLCCKWTSSS                  | Cheng et al, 2015              |
| AvBD9_TAEGU                       | ADTLACRQSRGSCSFVPCSAPLVDIGTCRGGKLCCKWTPSS                  | Cheng et al, 2015              |
| AvBD9_ANAPL                       | ADTVACRQSHGSCSFVACSGPLVDIGTCRNGKLCCKWTPSS                  | Cheng et al, 2015              |
| AvBD10_GALGA                      | DTVACRTQGNFCRAGACPPTFTISGQCHGGLNCCAKIPAQ                   | Cheng et al, 2015              |
| AvBD10_NIPNI                      | DTAECRSQGNFCRAGACPPTFAASGSCHGGLNCCSKILAE                   | Cheng et al, 2015              |
| AvBD10_TAEGU                      | DTVECRSQGRFCRAGACPPTFAATGTCHGGLNCCSKILAE                   | Cheng et al, 2015              |
| AvBD10_ANAPL                      | DTAACRSQGNFCRAGACPPTFAASGSCHGGLNCCSKILAE                   | Cheng et al, 2015              |
| AvBD12_GALGA                      | GPDSNCRDRGLCRVGNCPGEYLAKYCFEPVILCCKPLSPTPTKT               | Cheng et al, 2015              |
| AvBD12_NIPNI                      | GPDSNHEGGLCRVGNCIPGEYLARYCFEPIILCCKSLSPATAES               | Cheng et al, 2015              |
| AvBD12_TAEGU                      | GPDSNHEGGLCRMGSCVSGEYVAAQYCFEPIILCCKNPTATTES               | Cheng et al, 2015              |
| AvBD12_ANAPL                      | GPDSNHEGGLCRVGNCIPGEYLAKYCFEPVILCCKSPSTTTAKS               | Cheng et al, 2015              |
| AvBD13_GALGA                      | SDSQLCRNNHGHCRRLCFHMESWAGSCMNGRLRCCRFSTKQFSPNPKHSLHTAEQDPS | Cheng et al, 2015              |
| AvBD13_NIPNI                      | SDSQCRSNHGHCRRLCFHMERWEGSCSNGRLRCCR                        | Cheng et al, 2015              |
| AvBD13_TAEGU                      | SDTQCRSSRGHCRRLCFHMERWEGSCSNGRLRCCR                        | Cheng et al, 2015              |
| AvBD13_ANAPL                      | SDSQCRHDHGHCRRLCFHMERWAGSCSNGRLRCCR                        | Cheng et al, 2015              |
| AvBD14_GALGA                      | DTVTCRKMKGKCSFLLCPFFKRSSGTCYNGLAKCCRPFW                    | Cheng et al, 2015              |
| AvBD14_ANAPL                      | DTVMCRKIKGECFLLCSLFKRSIGTCYNGLAKCCIPF                      | Cheng et al, 2015              |
| AvBD11_GALGA_Nter                 | LPRDTSRCVGYHGYCIRSKVCPKPFAAFGTCSWRQKTCVV                   | NCBI database (NP_001001779.1) |
| AvBD11_NIPNI_Nter                 | MPKDTLRCVGYHGFCHFSKSCPEPFAAFGTCSRRQKTCCTCI                 | NCBI database (XP_009465634.1) |
| AvBD11_TAEGU_Nter                 | LPRDTRLRCLEYHGYCFHLKSCPEPFAAFGTCTYRRRTCCCL                 | NCBI database (XP_002186664.2) |
| AvBD11_ANAPL_Nter                 | LPKDTLRCVRYHGFQFPKACPPFAAFGTCSQRQKTCCTCI                   | NCBI database (XP_005028303.2) |
| AvBD11_GALGA_Cter                 | DTTSDFHTCQDKGGHCVSPKIRCLEEQLGLCPLKRWTCCKEI                 | NCBI database (NP_001001779.1) |
| AvBD11_NIPNI_Cter                 | DTTSNFHTCQDEGGHCVPEIKCLQEYVGLCPHREWKCCTEV                  | NCBI database (XP_009465634.1) |

|                   |                                                                                                      |                                              |
|-------------------|------------------------------------------------------------------------------------------------------|----------------------------------------------|
| AvBD11_TAEGU_Cter | DTTSNFHICQDEGGHCVPPEVRCLQEQEGLCPRRGWKCTEV                                                            | NCBI database<br>(XP_002186664.2)            |
| AvBD11_ANAPL_Cter | DTTSNLHTCQEEGGHCVPPIKICLRGLQLCPRKGWKCKEM                                                             | NCBI database<br>(XP_005028303.2)            |
| OvoDA1_GALGA      | LVLKYCPKIGYCSNTCSKTQIWATSHGCKMYCCLPASWKWK                                                            | Whenham et al,<br>2015; Zhang et al,<br>2019 |
| OvoDA2_GALGA      | LVLKYCPKIGYCSNTCSKTQIWATSHGCKMYCCLPASWKWK                                                            | Whenham et al,<br>2015; Zhang et al,<br>2019 |
| OvoDA3_GALGA      | LVLKYCPKIGYCSNTCSKTQIWATSHGCKMYCCLPANWKWK                                                            | Whenham et al,<br>2015; Zhang et al,<br>2019 |
| OvoDA1_NIPNI      | QIRKHCPKVGYCSSKCTKVDVWSFSADCKYYCCIPPGWQ GK                                                           | Zhang et al, 2019                            |
| OvoDA2_NIPNI      | QIRKQCPKVGYCSSCKNKADLWSFSADCKYYCCIPPGWK GK                                                           | Zhang et al, 2019                            |
| OvoDA1_TAEGU      | KFRKTCAPMGYCSPKCRVMDLKYTSGDCKYSCCIPTAWK GK                                                           | Whenham et al,<br>2015; Zhang et al,<br>2019 |
| OvoDA2_TAEGU      | KFRKTCAPMGYCSPKCRVMDLKYTSGDCKYSCCIPTAWK GK                                                           | Whenham et al,<br>2015; Zhang et al,<br>2019 |
| OvoDBalpha_GALGA  | APGYRKRKGTCKGYCAPTCNKKDEWSFHQSCKKMYCCLPLKKGK                                                         | Zhang et al, 2019                            |
| OvoDBalpha_NIPNI  | QLKGACGGYCSYTCARDEWTFQSQSGCKMYCCIPPKKGK                                                              | Zhang et al, 2019                            |
| OvoDBalpha_TAEGU  | AQGFCDDGYCAHACDETEEWSFNPYCEELHCCIPSPKKGK                                                             | Zhang et al, 2019                            |
| OvoDBbeta_GALGA   | QSKKCCGRCSSRMCTKREKEHTEDCRGSFCCCLTHRKKK                                                              | Zhang et al, 2019                            |
| OvoDBbeta_NIPNI   | QSKKSCSGYCSRTCAKGEKEHTEDCRRMYCCLTHRKKK                                                               | Zhang et al, 2019                            |
| OvoDBbeta_TAEGU   | QPKRSCRGHCSRTCGKGEREHTEDCGGMHCCCLTHRKRK                                                              | Whenham et al,<br>2015; Zhang et al,<br>2019 |
| OvoDA1_ANAPL      | QVRKYCPKVGYCSSKSKADVWSLSSDCKFYCCLPPGWK GK                                                            | Whenham et al,<br>2015                       |
| OvoDB1_ANAPL      | QKKGFCAGYCSYCAKTDEWTFHQTCGKMYCCIPPKKGK                                                               | Whenham et al,<br>2015                       |
| BD1_GAVGA         | QHKAQEEAQDPALQDEAEAVMAAPENTPISRSSCRRSGATCRVGFCFGGELKLGSC<br>AFLRPCCKELPGL                            | Santana et al, 2021                          |
| BD2_GAVGA         | QDMAVAQDEAEPQDLDEMGEAEATKVMEDIAAAGMDFPGLNLGESPACRWRNR<br>GICRRTYCKKHDRNCRYNPCRIQERRAGWCLSSHVCCVKALL  | Santana et al, 2021                          |
| BD3_GAVGA         | QDIQAQNKAEIQELNNPAQLRRRKFCFRRGVCKSRCSRNEDSARRCRNRQHCCVK<br>RRHH                                      | Santana et al, 2021                          |
| BD4_GAVGA         | QAQAQDVVATQGEAEAQDLDEVDEEAEDNAMEAEYAARMGSPDVKPQEFPLVC<br>RVLLGVCRFSSRCQKNERTIGSCSSRRACCKRH           | Santana et al, 2021                          |
| BD5_GAVGA         | FFQIYGNTKLCKLGGSCFLRSCPRKFVSFGTCTRECMCCIRVRRVRD                                                      | Santana et al, 2021                          |
| BD8_GAVGA         | FPKIGYFHCQSRKGQCQFQHTCPNTKYIGSCNQLGNCCQR                                                             | Santana et al, 2021                          |
| BD9_GAVGA         | LVTVMAQGEAEPQDLGEMQEQAEDNIMEAEDSDYKGSADLKPLASPLWCGWK G<br>GYCQHCKKEEHTGTWCTMNYVCC                    | Santana et al, 2021                          |
| BD10_GAVGA        | FVDVAPADTIACRNQGNFCRLRTCPPTFEGTGTCHNGALLCCSKVPGS                                                     | Santana et al, 2021                          |
| BD12_GAVGA        | SKHICRTAGGQCRMGTCLSGEVRIGDCFPVILCCKKYPVRKTTRELQ RGA                                                  | Santana et al, 2021                          |
| BD13_GAVGA        | TYYSTLQCRNNHGHCRRLCFHGEQWIGNCNGRHHQHCCK                                                              | Santana et al, 2021                          |
| BD14_GAVGA        | DTLTCMKNNGTCSFMLCPIFMKAIGTCYDGEAKCCRRCI                                                              | Santana et al, 2021                          |
| BD15_GAVGA        | QPYRSLDMGGRCVRYDICHFNFINARCPHRTVCCRRY                                                                | Santana et al, 2021                          |
| BD17_GAVGA        | LGRCNLLNGVCRHTLCHSLEKYVGRCHRGLRNCCVDDYVLKYKM                                                         | Santana et al, 2021                          |
| BD18_GAVGA        | LPFPITKLSLSSHADLKPFGSPDCHRGIGICRCFICNLFEITIGSCNRNHHVCCRRWI                                           | Santana et al, 2021                          |
| BD19_GAVGA        | QQYRDCKDRGGDCILHDTCLSTGEVIYAPCPRWLICRRRLW                                                            | Santana et al, 2021                          |
| BD20_GAVGA        | QRATRYVNHCLQGGTCRYDDCEAGEEQIGTCYRQTMVCCRDEE                                                          | Santana et al, 2021                          |
| BD21_GAVGA        | LPILSLQLCLNLQGTCLFSVFCSGITIRLLGCNCCSP                                                                | Santana et al, 2021                          |
| BD23_GAVGA        | IPSCRFSGGHCIWNWERCSSGRFLAAPCPRKRCKCS                                                                 | Santana et al, 2021                          |
| BD1_CROPO         | QHKAQEEAQDPALQDEAEAVMAAPENTPISRSSCRRSGATCRVGFCFGGELRLGSC<br>AFLRPCCKELPGL                            | Santana et al, 2021                          |
| BD2_CROPO         | QDVVVAQDKAEPQDLDEMEEAETEVMEAQDAAGMDFPGLNLGESPACRWRWR<br>GICRPTHCKKNDPNCRYNPCRFQERIVGWCLSSHVCCVKAKL   | Santana et al, 2021                          |
| BD3_CROPO         | QDIQAQNKAEIQELNNPAQPRRRKFCFRRGVCKSRCSRNEDSARRCRNRQHCCIKR<br>RH                                       | Santana et al, 2021                          |
| BD4_CROPO         | QDVVVTQGEAEAQDLDEMDEEAEDNAMEAEYAARMGSPDVKPQEFVVCRI LLG<br>VCRFSRCRKNERTIGSCSSSRACCKRR                | Santana et al, 2021                          |
| BD5_CROPO         | FFQIYGNTKLCKLNGGSCFLRSCPRKFVSFGTCTRECMCCIR                                                           | Santana et al, 2021                          |
| BD8_CROPO         | FPKIGYFHCRSQNGNICYQYACPPNTKYIGSCNKLGNCCQ RV                                                          | Santana et al, 2021                          |
| BD9_CROPO         | QVTVVAQGEAEPQDLGEKQEQAEDNIMEAEDAGYKGSADLKPLPSPLWCGWKGG<br>YCRHHCKKEERKTGWCTTNYVCC                    | Santana et al, 2021                          |
| BD10_CROPO        | FVDVAPADTVACRNQGNFCRLGTCPPTFEGTGTCHNGALLCCSKVPGL                                                     | Santana et al, 2021                          |
| BD12_CROPO        | SKHVCRTAGGQCRMGICLSGEVRIGDCFIPVILCCKKYPVRKETGELQ GGA                                                 | Santana et al, 2021                          |
| BD13_CROPO        | SYYSTLQCRNNHGHCRRLCFHGEQWIGNCNGRHHQHCCK                                                              | Santana et al, 2021                          |
| BD14_CROPO        | DTLTCTKNNGTCAFMLCPIFMKAIGTCYDGAACCCRRCI                                                              | Santana et al, 2021                          |
| BD15_CROPO        | SRSLDRGGRCIRYNTCHPNLIINARCPHQTVCRRR                                                                  | Santana et al, 2021                          |
| BD17_CROPO        | LGRCNLLNGVCRHTLCHSLEKYVGRCHRGLRNCCVDDYVLKYKM                                                         | Santana et al, 2021                          |
| BD18_CROPO        | QDLKPHGSPTDCHRLKIGICRHVFCNLFEITIGYCNRRHHVCCRRWI                                                      | Santana et al, 2021                          |
| BD19_CROPO        | QQYHDCCKDRGGDCILHDTCLSSGEVIYAPCPRWLICRRRLR                                                           | Santana et al, 2021                          |
| BD20_CROPO        | QRATRYVNHCLQGGTCRYDDCEAGEEQIGTCYRQTMVCCRDEE                                                          | Santana et al, 2021                          |
| BD21_CROPO        | LPILSFLQLCLNLQGTCLLTVGFCNGITIRLLGDCDCCTP                                                             | Santana et al, 2021                          |
| BD23_CROPO        | SPSCRSFGDHCIWNWERCSSGRFLAVPCPRKRCKCS                                                                 | Santana et al, 2021                          |
| BD1_ALLMI         | QHKAQEEAQDPALQDEAEAVMAAPENTPISRSNCKRSGATCRVGFCFGGEIKLGSC<br>AFLRPCCKELPGL                            | Santana et al, 2021                          |
| BD2_ALLMI         | QDVVVAQDEAEPQDLGEMEEAEETEVMEAEADATGMDFPGPKLGESPAHCRWKRG<br>VCCRTHCKRNDNRNCRHTPCPAERIIGWCLSTYVCCRKAYL | Santana et al, 2021                          |

|                          |                                                                                                    |                     |
|--------------------------|----------------------------------------------------------------------------------------------------|---------------------|
| BD3_ALLMI                | QDIQAQDKAEIQELNHPAQPRRRKFCRSRQGVCKPRCSGNENSSRRRCRNHRQCCVK<br>RRQ                                   | Santana et al, 2021 |
| BD4_ALLMI                | QDVVVAQDEAEAQDLDDIDEEAQDNAMEAEYAATMGSPDVKPEYPPVCRVLL<br>GVCPRFCLRNERTIGSCSSNHACCKRY                | Santana et al, 2021 |
| BD5_ALLMI                | FFQIYWNTKLCKLNGGSCFLRSCPQRFVSGTCTQECMCCIRHRTRD                                                     | Santana et al, 2021 |
| BD6_ALLMI                | MPNPVGEKDPQKEADTWDEVEDDVGEEDGVEAQGRGENSPMICGFSGGSCRTG<br>CSSNEVMAGKCYGSYLCCIPR                     | Santana et al, 2021 |
| BD7_ALLMI                | MPNPVGEKQPHKEADTWGVEDDASKAKGNVEAEGAGGENNPMVCSYSGGSCR<br>QRCIGHEVMVGKCYGTIFCCVHM                    | Santana et al, 2021 |
| BD8_ALLMI                | FPQIGYFHCQONKQGCQFQHICPPNTKYIGSCKQLGNCCQRV                                                         | Santana et al, 2021 |
| BD9_ALLMI                | QVTVVAGEAEPQDLGEMQEQAEDNVMDAEDADDKGSADLPLASPLWCGWKGG<br>YCRHHCKEKEKRTGLCTVNYVCCCL                  | Santana et al, 2021 |
| BD11_ALLMI               | QDGAVAQDEAEAQDLDEMEEEAEDEFVEAEDAAGMGSPELARKDRPRCRKGLFC<br>RPKCGQKEHVIGTCKPKGLICCRIL                | Santana et al, 2021 |
| BD12_ALLMI               | SKNVCRSAGGQCMGTCLSGEVRIGDCFTPVILCCKKYLARKTPGELQGGA                                                 | Santana et al, 2021 |
| BD13_ALLMI               | SYYSTLQCRNNHGHCRRLCFHRRERWIGNCNGGHQHCK                                                             | Santana et al, 2021 |
| BD14_ALLMI               | DTLTCTKNNGTCSFMLCPIFMKAIGSCYDGAACKCRRCI                                                            | Santana et al, 2021 |
| BD15_ALLMI               | YRECRNRGGECPHSGSCHPGSVIPVRCPHRTVCCRRR                                                              | Santana et al, 2021 |
| BD16_ALLMI               | MPNPVGENDPQVEADTWDEVEDDAGEAEGDVEAEGAGGENSPMICGFSGGSCRT<br>VCLISEVMAGKCYSSYLCLLPR                   | Santana et al, 2021 |
| BD17_ALLMI               | LGRCNLLNGVCRHTLCHSLEKYIGRCHRLRNCCVDDYVLKYKM                                                        | Santana et al, 2021 |
| BD18_ALLMI               | LKPQGSPTDCHRLGVCRSFLCFFFTTIGSCNRHQVCCRRWI                                                          | Santana et al, 2021 |
| BD19_ALLMI               | QEYHDCKNRGGDCILHDTCLSTGEIYAPCPRWLICCKRLR                                                           | Santana et al, 2021 |
| BD20_ALLMI               | QRASRYVNHCLQKGGTCRYDDCEAGEEQIGTCYRQTMVCCRDEE                                                       | Santana et al, 2021 |
| BD21_ALLMI               | LPILSLIQCLNLGGICLISVSLCDGVTIRLLGCNCCSSR                                                            | Santana et al, 2021 |
| BD23_ALLMI               | EEVIPSCRFSGGYCIWNWERCRSQHFLVALCPFRKRCKKS                                                           | Santana et al, 2021 |
| BD1_ALLSI                | QHKAQEEAQDPALQDEAEAMLAAPENSPISRSNCKRSGAICRVGFCFGGEVKLGSC<br>AFLRPCKKELPGL                          | Santana et al, 2021 |
| BD2_ALLSI                | QDVVVAQDEAEAQDLDEMEEEAEDEVMEAEADATGMDFPKLGESPAHCRWKRG<br>VCRPTHCKRNDNSNCRHTPCPEERIIGWCLSTHVCCRKALL | Santana et al, 2021 |
| BD3_ALLSI                | QDIPAQDKAEIQELNHPAQPRRRKFCSSRRGVCKSRCSGNENSSRRRCRNQRCCVKR<br>RQ                                    | Santana et al, 2021 |
| BD4_ALLSI                | QDVVVAQGEAEAQDIDDMDEEVQDNAMEAEYAASMGSPDVKPEYPIVCRVLLG<br>VCRPFCLRNERTIGSCSSNHACCKRH                | Santana et al, 2021 |
| BD5_ALLSI                | FFQIYGNTKLCKLNGGSCFLRSCPQRFVSGTCTRECMCCIRTRD                                                       | Santana et al, 2021 |
| BD6_ALLSI                | MPNPVGEKDPKEADTWDEVEDDAGEEGDVEAEGAEGENSPMICGFSGGSCRTS<br>CSSNEVMAGKCYGSYLCCVPR                     | Santana et al, 2021 |
| BD7_ALLSI                | NPVGEKQPKQKEADTWGVEDDASETKGDVEAEGAGGQNNPMICSYSGGSCRPRC<br>TGHEVMVGKCYGTIFCCVHM                     | Santana et al, 2021 |
| BD8_ALLSI                | FPQIGYFHCQONKQGCQFKHICPPNTKYIGSCKQLGNCCQRV                                                         | Santana et al, 2021 |
| BD9_ALLSI                | QVTVVAGEAEPQDLGEMQEQAEDNVMDAEDADDKGSADLKLASPLWCGWK<br>GGYCRHHCKEKEKRTGLCTVNYVCCCL                  | Santana et al, 2021 |
| BD10_ALLSI               | FVDVAPADTVACRSQQNFCRLGTCPTFEASGTCHNGALLCCSKVPGV                                                    | Santana et al, 2021 |
| BD11_ALLSI               | QDGAVAQDESEAQDLDEMEEEAEDEFVEAEDVAGMGSPELARKDRPRCRKGLFC<br>RPKCGRKEHVIGTCKPKGLICCRIL                | Santana et al, 2021 |
| BD12_ALLSI               | SKNVCRSAGGQCMGTCLSGEVRIGDCFTPVILCCKKYLARKTTGELQGGA                                                 | Santana et al, 2021 |
| BD13_ALLSI               | SYYSTLQCRSNHGHCRRLCFHGERWIGNCNGGHQHCK                                                              | Santana et al, 2021 |
| BD14_ALLSI               | DTLTCTKNNGTCSFMLCPIFMKAIGTCYDGAACKCRRCI                                                            | Santana et al, 2021 |
| BD15_ALLSI               | SRECWNRRGGDCRPHGSCRPGSVIPVRCPYRTVCCRRR                                                             | Santana et al, 2021 |
| BD16_ALLSI               | MPNPVGENDPQKEADTWDEVEDDAWEAEGDVEAAGASGENSPMICGFSGGSCRT<br>VCLISEVMAGKCYGSYVCCVPR                   | Santana et al, 2021 |
| BD17_ALLSI               | LGPCNLLNGVCRHTLCHSLEKYVGRCHHGLRNCCVDDYVLKYKM                                                       | Santana et al, 2021 |
| BD18_ALLSI               | LKPHGSPTDCHTQLGVCRRFLCFFFEKTIGSCNRQQVCCRRWI                                                        | Santana et al, 2021 |
| BD19_ALLSI               | QEYHDCKNRGGDCILHDTCLSTGEIYAPCPRWLICCRRLR                                                           | Santana et al, 2021 |
| BD20_ALLSI               | QRASRYVNHCLQKGGTCRYDDCEAGEEQIGTCYRQTMVCCRDEE                                                       | Santana et al, 2021 |
| BD21_ALLSI               | LPILPLIQCLNLGGICLISVSLCDGITIRLLGCNCCSSH                                                            | Santana et al, 2021 |
| BD22_ALLSI               | QHKVQEEAQDPALQDEAEAVMAAPESTPISRSHCRCSGTMCTEFCFRGEVKLGS<br>CTFLHPCKKELLG                            | Santana et al, 2021 |
| ENSCPBG00000020207_CHRPI | ECLSNHGHCRRLCFHMEHQVGTCTNGHLRCCK                                                                   | Ensembl database    |
| ENSCPBG00000020212_CHRPI | QGSEASCRRTGGLCLVSKCTQAEHHVEYCLTPVILCCKRLPVST                                                       | Ensembl database    |
| ENSCPBG00000020214_CHRPI | TLLHLIDSACKGKHGRCKAFCLFNERRIGMCTFSRRFCCRRKK                                                        | Ensembl database    |
| ENSCPBG00000020216_CHRPI | LPADTLRCISNGLCHQTLCPGTLFEFGTCSHGRATCCCKGRW                                                         | Ensembl database    |
| ENSCPBG00000020217_CHRPI | EDQDEPQOEPLTGNSHGLYQSKLTVPVVSLSFVNGNLSFLFAEIRSSCFASGGQCRHGL<br>CPWKEMKIASCGFARPCCKKVI              | Ensembl database    |
| ENSCPBG00000020219_CHRPI | DFLDNINCRSNFGFCHSGDCPISTTLTGTCINGKINCKRRTTP                                                        | Ensembl database    |
| ENSCPBG00000020224_CHRPI | DVGPPPADTLACKAQGGFCLLNCPPVFSVSGTCHGGQLQCCTSVVPQSME                                                 | Ensembl database    |
| ENSCPBG00000020230_CHRPI | QNIQCIRLGGSCRSGSCPSGFARIGTCSGSDSCCLLREPWHYP                                                        | Ensembl database    |
| ENSCPBG00000020233_CHRPI | FTCSPGATMRCLQNGGRCYWPQCPPNTYNIGRCCPWRLCRRVS                                                        | Ensembl database    |
| ENSCPBG00000020235_CHRPI | QGINTPFACRRAGGFCRRGRCPNFRIRIGSCGFQSCCKRGWVSSGCHKGDITV                                              | Ensembl database    |
| ENSCPBG00000020239_CHRPI | EFINSSRACRRARGSCFRVCFRRYRLIGTCGGQLSCCRTWVSSGSTKLISQC                                               | Ensembl database    |
| ENSCPBG00000020243_CHRPI | MSHDNGIHLKLVAFSFRWGTQFIDKRRACIFSGGFCRGRCPNFRIRIGSCSFGQS<br>CSFSIKKTALILPL                          | Ensembl database    |
| ENSCPBG00000020248_CHRPI | CIEYGGLCFGACPPFRIGIGSCGGVSCCVWRVSSGFHKANVTV                                                        | Ensembl database    |
| ENSCPBG0000003006_CHRPI  | EHILSDTVMCRNTQKGCSFAICPFFTNANGTCYNGKAKCCRPYL                                                       | Ensembl database    |
| ENSCPBG0000003028_CHRPI  | QNFNINCIKKGFCFFWRCPQNWKLIGFCSNGYVCCIRRRRWGLGSEDLS                                                  | Ensembl database    |
| ENSCPBG0000003054_CHRPI  | YDLNRNCLRGIGICYIGICPRRMFRSGSCSRGNVCCLSVCVWYNYTGV                                                   | Ensembl database    |
| ENSCPBG0000003079_CHRPI  | TEVSDRGIIGTAVCLSKKGACFLFHCPLNTMRIGRCGLFWHCCRW                                                      | Ensembl database    |
| ENSTMTG00000011266_TERCA | LPADTLRCINNNGFCYQTRCPGTLFEFGTCSHGRATCCCKGRW                                                        | Ensembl database    |
| ENSCSRG00000018998_CHESE | LNNGLTLPLAGLISHFSDTPVPPAGLSLPADTLRCVSNGLCHQTLCPRPLFALG<br>TCSYGRITTCCKGRW                          | Ensembl database    |
| ENSPCEG0000007416_PELCA  | YLLKLIDSFTCKRKHGMCREDFCYLNEKQIGTCPLSRWYCCRRKK                                                      | Ensembl database    |

## References:

- Cheng, Y.; Prickett, M.D.; Gutowska, W.; Kuo, R.; Belov, K.; Burt, D.W. Evolution of the avian beta-defensin and cathelicidin genes. *BMC Evol Biol* **2015**, *15*, 188, doi:10.1186/s12862-015-0465-3.
- Santana, F.L.; Estrada, K.; Ortiz, E.; Corzo, G. Reptilian beta-defensins: Expanding the repertoire of known crocodylian peptides. *Peptides* **2021**, *136*, 170473, doi:10.1016/j.peptides.2020.170473.
- Whenham, N.; Lu, T.C.; Maidin, M.B.; Wilson, P.W.; Bain, M.M.; Stevenson, M.L.; Stevens, M.P.; Bedford, M.R.; Dunn, I.C. Ovodefensins, an Oviduct-Specific Antimicrobial Gene Family, Have Evolved in Birds and Reptiles to Protect the Egg by Both Sequence and Intra-Six-Cysteine Sequence Motif Spacing. *Biol Reprod* **2015**, *92*, 154, doi:10.1095/biolreprod.114.126839.
- Zhang, L.; Chen, D.; Yu, L.; Wei, Y.; Li, J.; Zhou, C. Genome-wide analysis of the ovodefensin gene family: Monophyletic origin, independent gene duplication and presence of different selection patterns. *Infect Genet Evol* **2019**, *68*, 265-272, doi:10.1016/j.meegid.2019.01.001.
