# Supplementary material for: The Two Domains of the Avian Double-β-Defensin AvBD11 Have Different Ancestors, Common with Potential Monodomain Crocodile and Turtle Defensins
Source: MDPI journal article supplement (doi:10.3390/biology11050690), 2022-04-30
Supplement: s1 [file s1]

**Table S3. List of nucleotide sequences used for the positive selection analysis.**

| Bird species                      | Accession (NCBI or Ensembl) | Nucleotide sequence (mature region)                                                                                                                                                                                                                                         | Protein accession (NCBI or Ensembl) |
|-----------------------------------|-----------------------------|-----------------------------------------------------------------------------------------------------------------------------------------------------------------------------------------------------------------------------------------------------------------------------|-------------------------------------|
| <i>Apteryx rowi</i>               | XM_026061083.1              | TTGCCTAAAGACACCTTACGTTGTGTTGCCTACCATGGTTTCTGCTTCCGTTT<br>AAAAGCCTGCCCCAGCACCTTTTGTGTCATTTGGAACCTGCTCTCGGCGTCAGA<br>AAACCTGCTGCATAGACACTACATCAAACCTCCATATTTGTAAAGATGAGGG<br>GGGTCATTGCGTACCTCCAGAAATCAAATGTTTCCAAGAACATCTGGGACTT<br>TGCCCTCGCAAAGAATGGAAGTGCTGCAAAGAAATGCAA  | XP_025916868.1                      |
| <i>Dromaius novaehollandiae</i>   | XM_026113496.1              | TTGCCTAGACACACCTTACATTGTGTTGCCTACCATGGTTACTGCTTCCATT<br>AAAAGTCTGCCCCAACGCCCTTTTGTGTCATTTGGAACCTGCTCTCGGCGTCAGA<br>AAACCTGCTGCATAGATACTACATCAAACCTCCATATTTGTAAAGATGAGGG<br>GGGTCATTGCGTACCTCCAGAAATCGAATGTCTTCAAGAACAGCTGGGACTT<br>TGCCCTCACAAGAATGGAAGTGCTGCAAGGAAATGCAA   | XP_025969281.1                      |
| <i>Chauna torquata</i>            | VXAL01001524.1              | TTGCCCCAAGACACCTTACGTTGTGTTGGCTACCATGGTTTCTGCTTCCGCTC<br>AAAAGTCTGCCCCAACACCATTTTGTGTCATTTGGAACCTGCTCTTGGCGTCAGA<br>AAACCTGCTGCATAGACACTACATCAAACCTTGCATACCTGTCAAGATGAAGG<br>GGGCCATTGTGTACCTCCGAAAATCAGATGTCTGCAAGAAGAACAGCTGGGACTT<br>TGCCCTCACAGAAATGGAAGTGCTGCAAAGAAGTG | NXK44927.1                          |
| <i>Anseranas semipalmata</i>      | VXAA01000532.1              | TTGCCCCAAGACACCTTACGCTGTGTTGCTACCATGGTTTCTGCTTCCATT<br>AGAAGTCTGCCCCAACACCATTTTGTGTCATTTGGAACCTGCTCTCGCTGCAG<br>AAACCTGCTGCATAGACACTACATCAAACCTTCCATACTGTCAAGATGAAGG<br>GGGCCATTGCGTACCTCCAAAAATCAAATGTCTGCAAGAAGAACAGCTGGGACTT<br>TGCCCTCACAAGGAATGGAAGTGCTGCAAAGAAGTG     | NXI61744.1                          |
| <i>Anser cygnoides domesticus</i> | XM_013184427.1              | TTGCCCCAAGACACCTTACGTTGTGTTGCTACCATGGTTTCTGCTTCCAAAC<br>AAAAGCCTGCCCCAACGCCATTTTGTGTCATTTGGAACCTGCTCTGAACGTCAG<br>AAACCTGCTGCATAGACGCTACATCAAACCTCCATACTGTCAAGAAGAAG<br>GGGGCCATTGCGTACCTCCGAAAATCAAATGTCTGCAAGGGCAGCTGGGACTT<br>TTGCCCTCGCAAAGGATGGAAGTGCTGCAAAGAAGTGCAA   | XP_013039881.1                      |
| <i>Cygnus atratus</i>             | XM_035563646.1              | TTGCCCCAAGATACCTTACGTTGTGTTGCTACCATGGTTTCTGCTTCCAACC<br>AAAAGCCTGCCCCACCGCCATTTTGTGTCATTTGGAACCTGCTCTGAACGTCAG<br>AAACCTGCTGCATAGACGCTACATCAAACCTCCATACTGTCAAGAAGAAG<br>GGGGCCACTGCGTACCTCCGAAAATCAAATGTCTGCAAGGGCAGCTGGGACTT<br>TTGCCCTCGCAAAGGATGGAAGTGCTGCAAAGAAGTGCAA   | XP_035419539.1                      |
| <i>Anas platyrhynchos</i>         | XM_005028246.4              | TTGCCCCAAGACACCTTACGTTGTGTTGCTACCATGGTTTCTGCTTCCAACC<br>AAAAGCCTGCCCCACCGCCGTTTGTGTCATTTGGAACCTGCTCTCAACGTCAG<br>AAACCTGCTGCATAGACACTACATCAAACCTCCATACTGTCAAGAAGAAG<br>GGGGCCATTGCGTACCTCCGAAAATCAAATGTCTGCGAGGGCAGCTGGGACTT<br>TTGCCCTCGCAAAGGATGGAAGTGCTGCAAAGAGATG       | XP_005028303.2                      |
| <i>Odontophorus gujanensis</i>    | VXAB01005760.1              | TTGCCCCAGAGACACCTACGTTGTGTTGGCTACCATGGGTACTGCATCCGTTT<br>CAAAGTCTGTCCCAAACCATTTTGTGCTTTTGGAACTTGCTCTTGGCGTCAGA<br>AAACCTGCTGCGTAGATACTACATCAGACTTCCATACTGTCAAGATGAGGG<br>GGGCCATTGCGTATCTCCAAAAATCAGATGTCTGCAAGAAGAACAGCTGGGACTT<br>TGCCCTCTAAAAAATGGAAGTGCTGCAGAGAAATA     | NXJ08707.1                          |
| <i>Meleagris gallopavo</i>        | ENSMGAT00000015987.1        | TTGCCCCAGAGACACCTACGTTGTGTTGGCTACCATGGGTACTGCATCCGTTT<br>CAAAGTCTGCCCCAACCGTTTGTGTCATTTGGAACCTGCTCTTGGCGTCAGA<br>AAACCTGCTGTGTAGACGCTACATCAGCTTCCATAATTTGTCAAGACGAGGG<br>AGGCCATTGTGTATCTCCAAAAATCAGATGTCTGCAAGAAGAACAGCTGGGACTT<br>TGCCCTCTGAAAAAATGGAAGTGCTGCAAAGAAATA    | ENSMGAP00000015039.1                |
| <i>Coturnix japonica</i>          | XM_015859649.2              | TTGCCCCAGAGACACCTACGTTGTGTTGGCTACCATGGGTACTGCATCCGTTT<br>CAAAGTCTGCCCCAACCATTTTGTGTCATTTGGAACCTGCTCTTGGCGTCGGG<br>AAACCTGCTGTGTAGACACCATCAAACTTCCATACCTGTCAAGACGAGGG<br>GGGCCATTGTGTATCTCCAAAGATCAGATGTTTGAAGAAGAACAGATGGGACTC<br>TGCCCTCTAAAAAATGGAAGTGCTGCAAAGAAATA       | XP_015715135.1                      |
| <i>Gallus gallus</i>              | NM_001001779.1              | TTGCCCCAGAGACACCTACGTTGTGTTGGCTACCATGGGTACTGCATCCGTTT<br>CAAAGTCTGCCCCAACCATTTTGTGTCATTTGGAACATGCTCTTGGCGTCAGA<br>AAACCTGCTGCGTAGACACTACATCAGACTTCCATACTGTCAAGACGAGGG<br>GGGCCATTGCGTATCTCCAAAAATCAGATGTCTGGAAGAAGAACAGCTGGGACTT<br>TGCCCTCTAAAAAATGGAAGTGCTGCAAAGAAATA     | NP_001001779.1                      |
| <i>Columba livia</i>              | XM_005513638.2              | TTGCCCCAAGACACCTTACGTTGTGTTGATATCATGGTTTCTGCTTCCATT<br>CAAATCCTGCCCCAAGCCATTTTGTGTCATTTGGAACCTGCTCTTGGCGTCAGA<br>AAACCTGCTGCATAGACACGACATCAAACCTTCCATACTGTCAAGATGAGGG<br>AGGTCAATTGTGTGCTCCAGAAATCAAATGTCTGCAAGAACAAGTGGGACTT<br>TGCCCTCACAGAGGATGGAAGTGCTGCACAGAATTG       | XP_005513695.1                      |
| <i>Aramus guarauna</i>            | VXBL01010431.1              | TTGCCCCAAGACACCTTACGTTGTGTTGGATATCATGGTTTCTGCTTCCATT<br>AAAATCCTGCCCCAGAGCCGTTTGTGCGTTTGGAACTTGCTCTCGGCGCCAG<br>AAACCTGCTGCATAGACACGACATCAAACCTTCCATACCTGTCAAGACGACG<br>GGGGTCATTGCGTACCTCCAGAAATCAAATGTCTGCAAAAGCAGATGGGACTT<br>TTGCCCTCACAGAGGATGGAAGTGCTGCACAGAAGTG      | NXO60882.1                          |
| <i>Charadrius vociferus</i>       | KL872452.1                  | TTGCCCCAAGACACCTTACGTTGTGTTGGATACCATGGTTTCTGCTTCCGTTT<br>AAAATCCTGCCCCAGAGCCATTTTGTGCGTTTGGAACTTGCTATCGGCGTCAG<br>AAACCTGCTGCATAGACACAACATCGAACTTCCATACTGTCAAGACGAGG<br>GGGGTCATTGCGTACCTCCAGAAATCAAATGTCTGCAAGAACAAGTGGGACTT<br>TTGCCCTCACAGAGAATGGAAGTGCTGCACAGAAGTG      | KGL95683.1                          |
| <i>Rostratula benghalensis</i>    | VXAI01000254.1              | TTGCCCCAAGACACCTTACGTTGTGTTGGATACCATGGTTTCTGCTTCCATT<br>AAAATCCTGCCCCAGGGCCATTTGTTACATTTGGAACCTTGCTCTCGGCGTCGGA<br>AAATGTGCTGCATAGACACAACATCAAACCTTCCATACGTGTCAAGCTGAGGG<br>GGGTCACTGTGTACCTCCAGAAATCAAATGTCTGCAGCAACAAGTGGGACTC<br>TGCCCTCACAGGAAATGGAAGTGCTGCACAGAAGTG    | NXJ68321.1                          |
| <i>Pedionomus torquatus</i>       | VZRU01010140.1              | TTGCCCCAAGACACCTTACGTTGTGTTGGATACCATGGTTTCTGCTTCCGTTT<br>AAAATCCTGCCCCAAGCCATTTGCGCATTTGGAACCTTGCTCTTGGCGTCAGA<br>AAACCTGCTGCATAGACACGACATCAAACCTTCCATACTGTCAAGATGAGGG<br>GGGTCACTGTGTACCTCCAAAAATCAAATGTCTGCAACAGCAAGTGGGACTT<br>TGCCCTCACAGGAAATGGAAGTGCTGCACAGAAGTG      | NWW48347.1                          |

|                                      |                |                                                                                                                                                                                                                                                           |                |
|--------------------------------------|----------------|-----------------------------------------------------------------------------------------------------------------------------------------------------------------------------------------------------------------------------------------------------------|----------------|
| <i>Thinocorus orbignyianus</i>       | VXBW01005935.1 | TTGCCCAAAGACACCTTACGTTGTGTTGGATACCGTGGTTTCTGCTTCCGTTCAAATCCTGCCACGGCCGTTTGCTGCATTGGAACTTGCTCTTGGCGTCAGAAACCTGCTGCATAGACACGACATCAAACCTTCCATCTTGCCAAGATGAGGGGGTCACTGTGTGCCTCCAAAAATCAAATGTCTGCAACAGCAAGTGGGACTTTGCCCTCACAGGAAATGGAAGTGCTGCACAGAAGTG         | NXP11758.1     |
| <i>Arenaria interpres</i>            | VXAK01013874.1 | TTGCCCAAAGACACCTTACGTTGTGTTGGATACCATGTTTCTGCTTCCGTTCAAATCCTGCCAGAGCCATTTGCTGCGTTTGGAACTTGCTCTTGGCGTCAGAAACCTGCTGCATAGACACGACATCAAACCTTCCATCTTGCTCAAGACGAAGGGGTCACTGTGTACCTCCAAAAATCAAATGTCTGCAACAACAAGTGGGACTTTGCCCTCACAGGAAATGGAAGTGCTGCACAGAAGTG        | NXK22639.1     |
| <i>Calidris pugnax</i>               | XM_014948388.1 | TTGCCCAAAGACACCTTACGTTGTGTTGGATACCAACGGTTTCTGCTTCCGTTCAAATCCTGCCAGAGCCATTTGCTGCGTTTGGAACTTGTTCTTGGCGTCAGAAACCTGCTGCATAGACACGACCTCAAACCTTCCATCTTGCTCAAGACGAAGGGGTCACTGTGTATCTCCAAAAATCAAATGTCTGCAACAACAAGTGGGACTTTGCCCTCACAGGAAATGGAAGTGCTGCACAGAAGTG      | XP_014803874.1 |
| <i>Sula dactylatra</i>               | WEKW01013102.1 | ATGCCCAAAGACACCTTACGCTGTGTTGGATACCAACGGTTTCTGCTTCCATTCAAATCCTGCCAGAGCCATTTGCCCGGATTGGAACTTGCTCTCGGCGTCAGAAAACCTGCTGCATAGACACGACATCAAACCTTCCATCTTGCTCAAGACGAGGGGTCACTGTGTACCTCCAGAAATCAAATGTCTGCAAGAACAAGTGGGACTTTGCCCTCACAGAGAATGGAAGTGCTGCACAGAAGTG      | NWI27162.1     |
| <i>Pelecanus crispus</i>             | XM_009490075.1 | ATGCCCAAAGACACCTTACGTTGTGTTGGATACCATGTTTCTGCTTCCATTCAAATCCTGCCAGAGCCGTTCCGCCGCTTTGGAACTTGCTCTCGGCGTCAGAAAACCTGCTGCATAGACACGACATCAAACCTTCCATCTTGCTCAAGATGAGGGGTCACTGTGTACCTACAGAAATCAAATGTCTGCAAGAACAAGTGGGACTTTGCCCTCATAGAGAATGGAAGTGCTGCACAGAAGTG        | XP_009488350.1 |
| <i>Colius striatus</i>               | XM_010204885.1 | TTGCCCAAAGACACCTCGCATTTGCTTGGATATGAAGTTTCTGCTTCCGATCAAATCCTGCCAGAGCCATTTGCTGCATTTGGAACTTGCTTGGGGTCAGAAAACCTGCTGCATAGACACAACATCAAACCTACCATAGTTGTGAAGACAAGGAGGGTCATTGCGTGCCTCCAGAAATCAAATGTCTGCAAGAACAAGTGGGGCTCTGCCCTCACAGAGAATGGAAGTGCTGCACAGAAGTG        | XP_010203187.1 |
| <i>Trogon melanurus</i>              | VXAG01001209.1 | TTGCCCAAAGACACCTTACGTTGTCTTGGATACCAACGGTTATTGCTTCCATTCAAATCCTGCCAGAACCATTCGCCGCGTTTGGAACTTGCTCTCGGCGTCAGAAAACCTGCTGCATAGACACGACATCAAATTTCCATCTTGCTCAAGATGAGGGGTCACTGTGTACCTCCAGAAATCGAATGTCTGCAAGAACAAGTGGGACTTTGCCCTCACAGAGGATGGAGGTGCTGCACAGAAGTG       | NXJ83125.1     |
| <i>Buceros rhinoceros silvestris</i> | KL517598.1     | TTACCCAAAGACACCTTACGTTGTGTTGGATACCATGTTTCTGCTTCCATTCAAATCCTGCCAGAGCCGTTTGCCGCGTTTGGAACTTGTTCTCGGCGTCAGAAACCTGCTGCATCGACACGACATCAAACCTTCCATATCTGTCAAGATGAGGGGGTCACTGTGTACCTCCAGAAATCGAATGTCTGCAAGAACAAGTGGGACTTTGCCCTCATGGAAAAATGGAAGTGCTGCACAGAAGTG       | KFO88553.1     |
| <i>Ceyx cyanopectus</i>              | VYZU01073949.1 | TTGCCCAAAGACACCTTACGTTGTCTTGGATACCAACGGTTCTGCTTCCGTTCAAATCCTGCCAGAGCCATTTGCTGCTTTTGGAACTTGCTCTTGGCGTCACAAACATGCTGCATAGACACGACATCAAATACCAGCACTTGCCAAGATGAGGGGTCACTGTGTACCTCAAAAAATCAAATGTGTGCAAGAACAAGTGGGACTTTGCCCTCACAGAGAATGGAAGTGCTGCACAGAAGTA         | NXY89543.1     |
| <i>Furnarius figulus</i>             | VYZD01000216.1 | TTGCCCAAAGACACCTGCGTTGTTTGGAAATACCACGGCTACTGCTTCCATTTGAAATCCTGCCAGAGCCATTTGCTGCGTTTGGAACTTGCTACCGGCGTCGGAAAACCTGCTGTGTGGACACAACATCCATCTCCACATTTGTGCGAGAGGAGGGGTCACTGTGTAGCCCCACACATCAGGTGCCTGCAAGAACAAGTGGGACTCTGCCCTCGCAGGGGATGGAAGTGCTGCTCAGAATTG       | NWR87765.1     |
| <i>Pseudopodoces humilis</i>         | XM_005528784.1 | TTGCCAGAGACACCTTGCCTGTGTTTGGAAATACCACGGCTACTGCTTCCATCTGAAATCCTGCCAGAGCCGTTTGCTGCCTTTGGAACTTGCTACCGGCGCCCGAGGACCTGCTGCGTTGACACGACATCCAACCTTCCACATCTGCCAAGATGAGGGGCCACTGTGTGCCCCAGAAATCAAATGTCTGCAAGAGCAAGAGGGACTCTGCCCTCGCAGAGGATGGAAGTGCTGCACAGAAGTG      | XP_005528841.1 |
| <i>Zosterops hypoxanthus</i>         | VWYL01016114.1 | TTGCCAAGGGACACCCAGCGCTGTTTGGAAACACCACGGTTACTGCTTCCACCTGAAATCCTGCCCGGAGCCGTTTGCTGCCTTTGGAAGCTGCTACCGGCGCCGGAGGACCTGCTGTGTGACACGACATCCAACCTTCCATGCCTGCCAGGATGAGGGGGCCACTGTGTGTCCCGAGAAATCAGATGTCTGCAAGAGCAAGAGGGACTCTGCCCCCGCAGAGGATGGAAGTGCTGCTCAAAAGTG    | NXR36414.1     |
| <i>Catharus ustulatus</i>            | XM_033056724.1 | TTGCCAAGGGACACCTTACGTTGTTTGGAAACACCACGGTTACTGCTTCCACCTGAGATCCTGCCCGGAGCCGTTTGCCCGCTTCCGGGACCTGCTACCGGCGCCCGAGGACCTGCTGTGTGGACACAACATCCAACCTTCCACATCTGCCAGCAGCAGGGGCCACTGTGTGTGCCCCAGAAATCAGATGTGTGCAAGAAGCAGGAGGGGCTCTGCCCTCGCAGAGGATGGAAGTGCTGCACAGAAGTG | XP_032912615.1 |
| <i>Taeniopygia guttata</i>           | XM_002186628.3 | TTGCCAAGGGACACCTGCGTTGTTTGGAAATACCACGGCTACTGCTTCCACCTGAAATCCTGCCAGAGCCGTTGCTGCTTTTGGAACTTGCTATCGGCGCCCGAGGACCTGCTGCCTTGACACGACATCCAACCTTCCACATCTGCCAAGATGAGGGGCCATTGTGTCCCCCAGAAATCAGATGTCTGCAAGAGCAAGAGGGACTCTGCCCTCGCAGAGGATGGAAGTGCTGCACAGAAGTG        | XP_002186664.2 |
