# Supplementary material for: The Two Domains of the Avian Double-β-Defensin AvBD11 Have Different Ancestors, Common with Potential Monodomain Crocodile and Turtle Defensins
Source: MDPI journal article supplement (doi:10.3390/biology11050690), 2022-04-30

**Figure S6. Phylogenetic trees of monodomain AvBDs and turtle beta-defensins obtained from (A) full MSA (non-curated) and from (B) automatically curated MSA (removal of gap positions)**

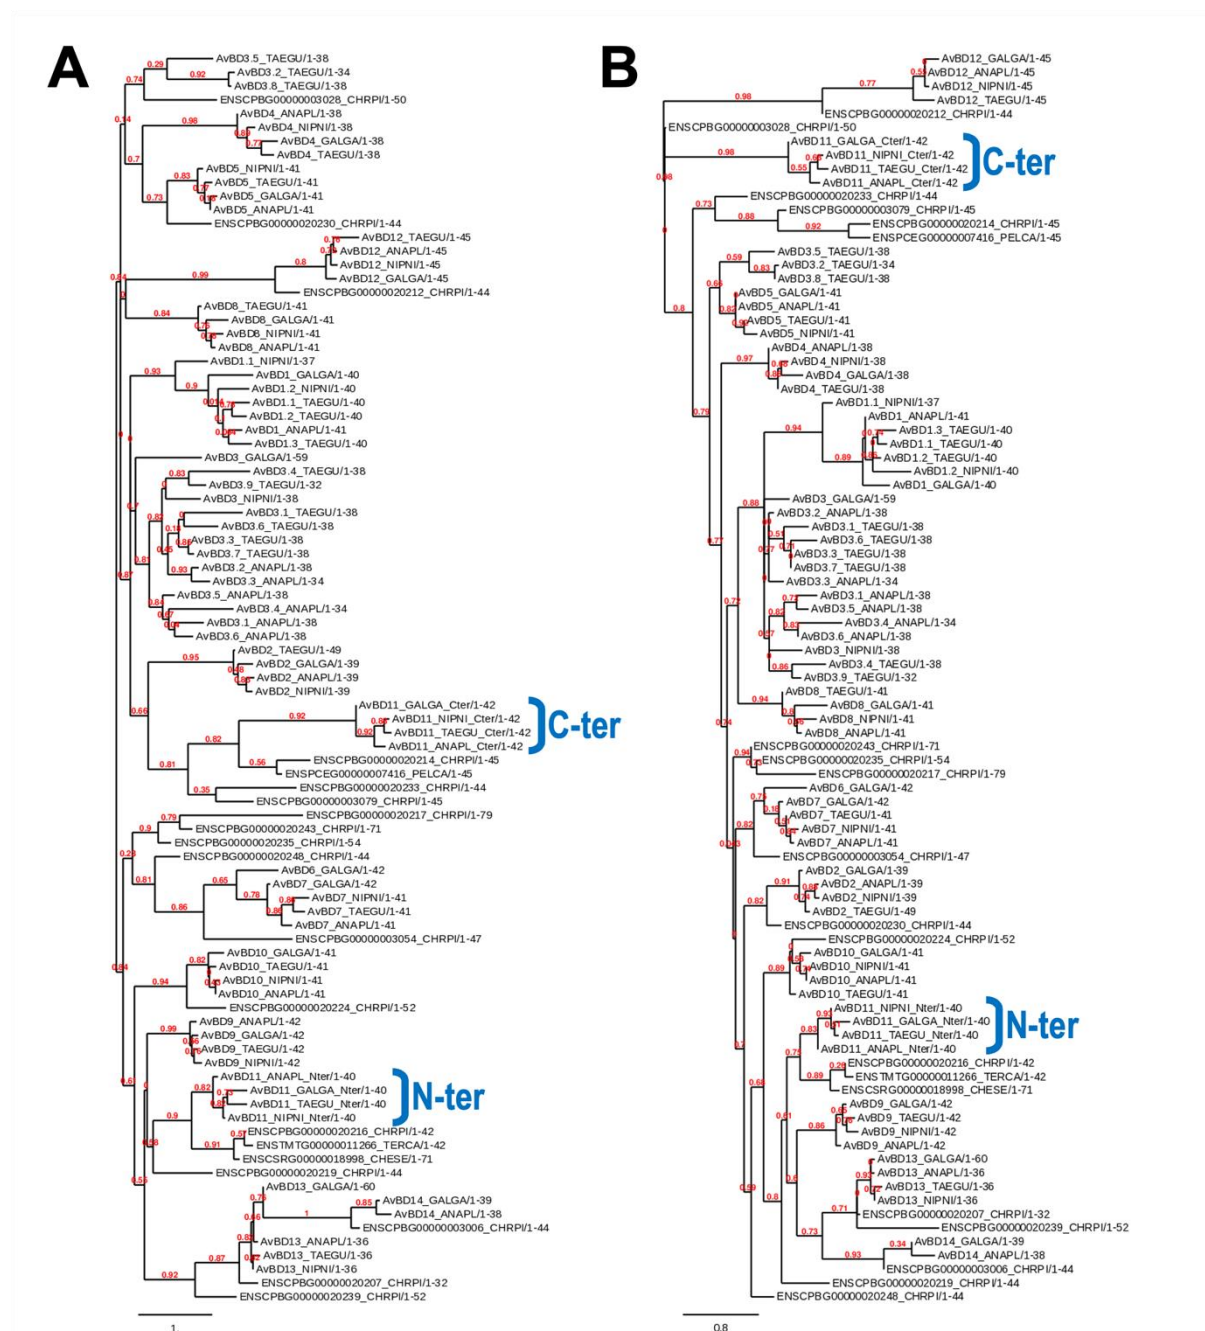

Supplement: s1 [file s1]
