# Supplementary material for: The Two Domains of the Avian Double-β-Defensin AvBD11 Have Different Ancestors, Common with Potential Monodomain Crocodile and Turtle Defensins
Source: MDPI journal article supplement (doi:10.3390/biology11050690), 2022-04-30

**Figure S7. Representation of the phylogenetic tree of bird AvBD11 sequences with the omega value (all are < 1), showing that there is no branch site positive selection.**

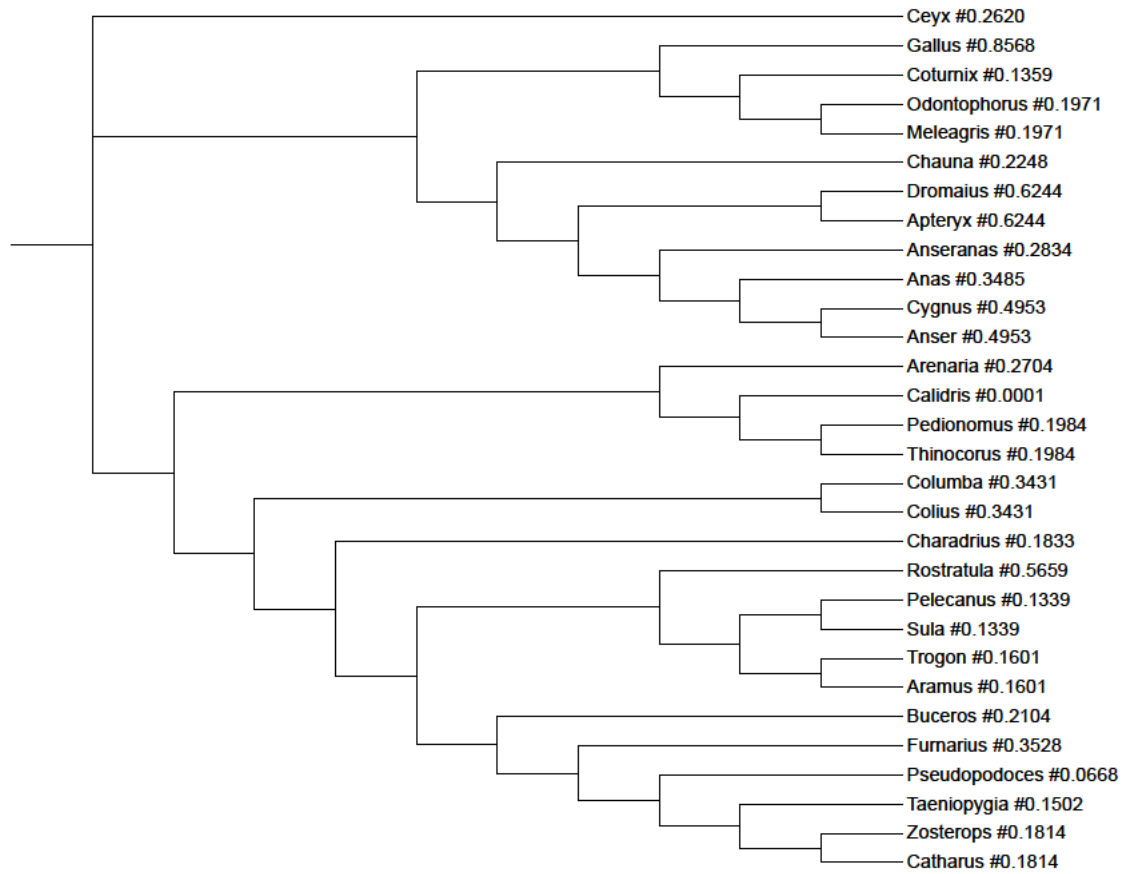

Supplement: s1 [file s1]
