# Supplementary material for: The Two Domains of the Avian Double-β-Defensin AvBD11 Have Different Ancestors, Common with Potential Monodomain Crocodile and Turtle Defensins
Source: MDPI journal article supplement (doi:10.3390/biology11050690), 2022-04-30
Supplement: s1 [file s1]

**Table S1. List of acronyms used for animal species used in the present study.**

| <b>Acronym</b> | <b>Latin name</b>                   | <b>Common name</b>      |
|----------------|-------------------------------------|-------------------------|
| ALLMI          | <i>Alligator mississippiensis</i>   | American alligator      |
| ALLSI          | <i>Alligator sinensis</i>           | Chinese alligator       |
| ANAPL          | <i>Anas platyrhynchos</i>           | Duck                    |
| CHESE          | <i>Chelydra serpentina</i>          | Common snapping turtle  |
| CHRP           | <i>Chrysemys picta bellii</i>       | Western painted turtle  |
| CROPO          | <i>Crocodylus porosus</i>           | Saltwater crocodile     |
| GALGA          | <i>Gallus gallus</i>                | Chicken                 |
| GAVGA          | <i>Gavialis gangeticus</i>          | Gharial                 |
| NIPNI          | <i>Nipponia nippon</i>              | Crested ibis            |
| PELCA          | <i>Pelusios castaneus</i>           | West African mud turtle |
| TAEGU          | <i>Taeniopygia guttata</i>          | Zebra finch             |
| TERCA          | <i>Terrapene Carolina triunguis</i> | three-toed box turtle   |
