# Supplementary material for: The Two Domains of the Avian Double-β-Defensin AvBD11 Have Different Ancestors, Common with Potential Monodomain Crocodile and Turtle Defensins
Source: MDPI journal article supplement (doi:10.3390/biology11050690), 2022-04-30

**Figure S9.** Backbone of Gga-AvBD11 (6QEU.pdb) rainbow colored from N-ter (in blue) to C-ter (in red) with disulfide bridges in sticks. Sidechains of W33 and R75 are represented in brown and blue, respectively.

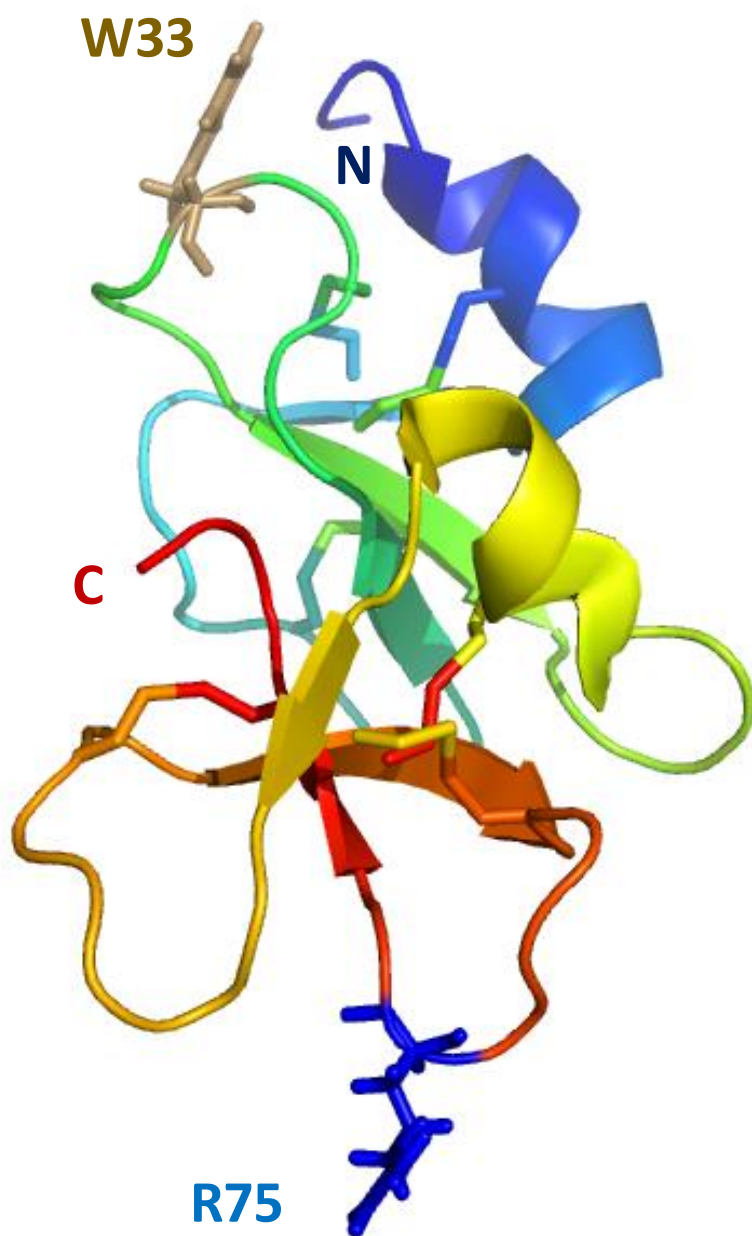

Supplement: s1 [file s1]
