# Supplementary material for: The Two Domains of the Avian Double-β-Defensin AvBD11 Have Different Ancestors, Common with Potential Monodomain Crocodile and Turtle Defensins
Source: MDPI journal article supplement (doi:10.3390/biology11050690), 2022-04-30
Supplement: s1 [file s1]

AvbD1\_GALGA - G R S D P F R K S S P F - A F L K H S L T L I S K S R P F - T L K - R I N G -  
 AvbD1\_ANAPL - G F L K S S P F - A F L K H S L T L I S K S R P F - T L K - R I N G -  
 AvbD1.1\_NIPNI - E N E G Q F Q S G Q - S F L K Y Y F Y H V P F S T P M V K - R S M R -  
 AvbD1.2\_NIPNI - G N K E Q H R Q K H - A L I V Q P F L A I A I K K S R P F F K - P I N G -  
 AvbD1.1\_TAGU - T N K E Q E Q N Q Q - S F L K Y Y F Y I A K K S R P F F K - E M W G -  
 AvbD1.2\_TAGU - I N K K Q E R E K V Q - S I P N S S P F Y I A I K K S R P F F K - K M W G -  
 AvbD1.3\_TAGU - T T L K S E N V Y - G F L K S S P F F F I K S S R P F F K - N V W G -  
 AvbD2\_GALGA - R D M L F - K K S S - H F G Q H S H L K V S G S G F - R S K - P F W N A -  
 AvbD2\_ANAPL - R D M F L - K K S S - H F G R P F H L V K V S G S G F - R S K - L P W D V -  
 AvbD2\_NIPNI - R D M F L - K K S S - H F G R P F H L V K V S G S G F - R S K - D P W N A -  
 AvbD2\_TAGU - R E M F L - K K S S - H F G Q H S H L K V S G S G F - R S K - S P W N V K E V D - - E P F I E R -  
 AvbD3\_GALGA - A T R I G S - A T R I G S - H V S G S P F - E R H I D S G F - Q A I - R T G -  
 AvbD3.1\_ANAPL - S V L I R I G S - H V S G S P F - E R H I D S G F - Q A I - R T G -  
 AvbD3.2\_ANAPL - N Q A E R R G S P F - T F G R P F F - T R P V G S S T L V P S R - S T W G -  
 AvbD3.3\_ANAPL - R Q A E R R G S P F - T F A R P F F - T F I D R S T A - V P S R -  
 AvbD3.4\_ANAPL - D I M T I E S R G - R F G Q Q P F A E Q I D S G F - I R I - V P S R -  
 AvbD3.5\_ANAPL - T F G N L P F - E R H I D S G F - Q A I - R T G -  
 AvbD3.6\_ANAPL - S M L V R G S N - R F G Q Q P F A E Q I D S G F - Q A I - R T G -  
 AvbD3\_NIPNI - P F R S I O R G S Y - S F G Q R Y P - A R S I D S G F - Q O K - N I N G -  
 AvbD3.1\_TAGU - H D K E V R G S P F - A V G Q R Y P - Y K Y V V S A L - S H K - P I N G -  
 AvbD3.2\_TAGU - A V T R R R G S P F - A N S I E R G - A R V V S I S P R - M L K -  
 AvbD3.3\_TAGU - T F B Q R G S P F - S T F I D S G F - Q A I - R T G -  
 AvbD3.4\_TAGU - P L L K R R G S Y - T L S I R G - A T P V M R T P Y - R V L - G S W Y -  
 AvbD3.5\_TAGU - P D Q R R I R P F - F R R S I E R - S A P V S R A R G - I A K - I V W G -  
 AvbD3.6\_TAGU - S A R R R R G S P F - S F G S S S P - S K P I D S G F - A V K - S R W Y -  
 AvbD3.7\_TAGU - P L L K R R G S P F - T F B Q R Y P - S T F I D S G F - Q A I - S H W Y -  
 AvbD3.8\_TAGU - A V T R R R G S P F - A N S I E R G - T R V V S S G W L - R L K P -  
 AvbD3.9\_TAGU - A V T R R R G S P F - T Y G R N P F - A R I D S G F - S V R - R -  
 AvbD4\_GALGA - R Y H M Q G Y G T P F - T P K R P Y G - N A Y I S L R P K - S R - W L -  
 AvbD4\_NIPNI - K P M R G Y G T P F - P P K P R G - N A Y I S L R S G - S R - W L -  
 AvbD4\_TAGU - R P Y M Q Y G T P F - R K G R P R G - N A Y I S L R S G - S R - W L -  
 AvbD4\_ANAPL - K W L M R G Y G T P F - T P Q S R G - N A Y I S L R S G - S R - W L -  
 AvbD5\_GALGA - G L P Q D - E R R G S P F - S H S P P G - I G R V I S S E - D F C - - R S R W Y S -  
 AvbD5\_NIPNI - G L P Q D - E R R G S P F - S H S P P G - I G R V I S S E - V F C - - R R M Y P F -  
 AvbD5\_TAGU - A S A Q D - E R R G S P F - S H S P P G - I G R V I S S E - E P F - - R R M Y P F -  
 AvbD5\_ANAPL - G S F Q D - E R R G S P F - S H S P P G - I G R V I S S E - D F C - - R R M Y P F -  
 AvbD6\_GALGA - - G P I D A R Y Q C H V - - P P Q R M P - Y Y V S S S S E L K S - V - R A N A -  
 AvbD7\_GALGA - R P I D T R L R N S - - F P Q I R R P - Y Y M I D I N N I G S - A - R G - W R S -  
 AvbD7\_NIPNI - E P H R P F I Q K H - - F P Q I R R P - Y Y M I D I N N I G S - A - R G - W R S -  
 AvbD7\_TAGU - R L N N P L M Q N S - - F R G I R R P - Y Y M I D I N N I G S - A - R G - W R S -  
 AvbD7\_ANAPL - R P D I L N Q S - - F P Q I R R P - Y Y M I D I N N I G S - A - R G - W R S -  
 AvbD8\_GALGA - N N E A Q E Q A S T - - S K D H P L M I T R A P S R G - V P R - T V Y D -  
 AvbD8\_NIPNI - N N D V Q F Q A G S T - - S T E H N L P M T R S P S R G - V P R - T V Y D -  
 AvbD8\_TAGU - N N E V Q F Q A G S V - - S S D R P P F M T R S P S R G - V P R - T V Y D -  
 AvbD8\_ANAPL - N N A V Q F Q A G S T - - S T D R P P F M T R S P S R G - V P R - T V Y D -  
 AvbD9\_GALGA - A D T L A R Q S H S G - - S F V A S A P - L V D I T R G G K L R K - W T P S S -  
 AvbD9\_NIPNI - A D T L A R Q S H S G - - S F V A S A P - L V D I T R G G K L R K - W T P S S -  
 AvbD9\_TAGU - A D T L A R Q S H S G - - S F V A S A P - L V D I T R G G K L R K - W T P S S -  
 AvbD9\_ANAPL - A D T L A R Q S H S G - - S F V A S A P - L V D I T R G G K L R K - W T P S S -  
 AvbD10\_GALGA - - D T V A R T G S N P F - R A G A P P T - F T I M Q H G G L L N A - K I P A Q -  
 AvbD10\_NIPNI - - D T A A R S G Q N P F - R A G A P P T - F A A S S H G G L L K S - K I L A E -  
 AvbD10\_TAGU - - D T V E R S G Q N P F - R A G A P P T - F A A S S H G G L L N A - K I L A E -  
 AvbD10\_ANAPL - - D T A A R S G Q N P F - R A G A P P T - F A A S S H G G L L K S - K I L A E -  
 AvbD12\_GALGA - - G P D S N H R G S L - R V G N I P G - E Y L A K Y F E P V I L K S P S P T T K T -  
 AvbD12\_NIPNI - - G P D S N H R G S L - R V G N I P G - E Y L A K Y F E P V I L K S S P T A K S -  
 AvbD12\_TAGU - - G P D S N H R G S L - R V G N I P G - E Y L A K Y F E P V I L K S S P T A K S -  
 AvbD12\_ANAPL - - G P D S N H R G S L - R V G N I P G - E Y L A K Y F E P V I L K S S P T T A K S -  
 AvbD13\_GALGA - - S D S Q I R N N H N - R - R L F I M - E S A N S E N G R L R K R P - S T K O P F S N P K - H S V H T A E Q D P P P -  
 AvbD13\_NIPNI - - S D S Q I R N N H N - R - R L F I M - E M W S E N G R L R K R -  
 AvbD13\_TAGU - - S D T Q R S R K H N - R - R L F I M - E M W S E N G R L R K R -  
 AvbD13\_ANAPL - - S D S Q I R N N H N - R - R L F I M - E M W S E N G R L R K R -  
 AvbD14\_GALGA - - D T V T R K M K K - S F L L S P F - K R S S I T Y M G L A K R - P F W -  
 AvbD14\_ANAPL - - D T V M R K K K E - S F L L S P F - K R S S I T Y M G L A K R - P F -  
 AvbD11\_GALGA\_Nter - L P R D S R E V G Y H Y P F - R S K V P K P - F A A P T I S R Q R K T - V -  
 AvbD11\_NIPNI\_Nter - M P K D L T R V G Y H Y P F - R S K V P K P - F A A P T I S R Q R K T - V -  
 AvbD11\_TAGU\_Nter - L P R D L T R V G Y H Y P F - R L L K S S P F - F A A P T I S R Q R K T - I -  
 AvbD11\_ANAPL\_Nter - L P K D L T L R V Y H Y P F - Q P R A P P F - F A A P T I S R Q R K T - I -  
 AvbD11\_GALGA\_Cter - D T S D F H T Q D K G S F V S P K R L E E - Q L S E P L K R N T K - E I -  
 AvbD11\_NIPNI\_Cter - D T S N F H T Q D E G S F V P P E K L G L E - Q V S L P H R E W K T - E V -  
 AvbD11\_TAGU\_Cter - D T S N F H T Q D E G S F V P P E V N G L G L E - Q V S L P R G W K T - E V -  
 AvbD11\_ANAPL\_Cter - D T S N F H T Q D E G S F V P P K R L S G L G L E - Q L S E P R G W K T - E M -  
 ENSCPB000000020207\_CHRP1 - E S I N N H N - R - R L F I M - E M W S E N G R L R K R -  
 ENSCPB000000020212\_CHRP1 - Q G S E A S R T G L G L - L V S K T Q A - E H N V E V L T P V L K R L P V S T -  
 ENSCPB000000020214\_CHRP1 - T L L H L I D S L A K K H R - R K A F F L N E R R I D S F R R P F - R K K -  
 ENSCPB000000020216\_CHRP1 - L F A D L T L R I N N L G - R Q L T L R G L E P F T S H R A T K - R K N -  
 ENSCPB000000020217\_CHRP1 - L F A T L R I N N L G - R Q L T L R G L E P F T S H R A T K - R K N -  
 ENSCPB000000020219\_CHRP1 - D F L - - D N I N R K N P F - H S G Q P S S - T L I D T I N K S I N K - R T T P -  
 ENSCPB000000020224\_CHRP1 - D V G P P P A D T L A K A G S P F -
