# Supplementary material for: The Two Domains of the Avian Double-β-Defensin AvBD11 Have Different Ancestors, Common with Potential Monodomain Crocodile and Turtle Defensins
Source: Biology (Basel). 2022 Apr 30;11(5):690. doi: 10.3390/biology11050690 (PMC9138766; doi:10.3390/biology11050690)
Supplement: Supplementary file 1 [file biology-11-00690-s001.zip]

Archive with 17 entries (17 files):
- Figure S1.pdf
- Figure S10.pdf
- Figure S11.pdf
- Figure S12.pdf
- Figure S13.pdf
- Figure S14.pdf
- Figure S2.pdf
- Figure S3.pdf
- Figure S4.pdf
- Figure S5.pdf
- Figure S6.pdf
- Figure S7.pdf
- Figure S8.pdf
- Figure S9.pdf
- Table S1.pdf
- Table S2.pdf
- Table S3.pdf
