# Supplementary figures and images for: The Two Domains of the Avian Double-β-Defensin AvBD11 Have Different Ancestors, Common with Potential Monodomain Crocodile and Turtle Defensins
Source: MDPI journal article supplement (doi:10.3390/biology11050690), 2022-04-30

**Figure S1. Full (untrimmed) MSA of monodomain AvBDs and OvoDs**

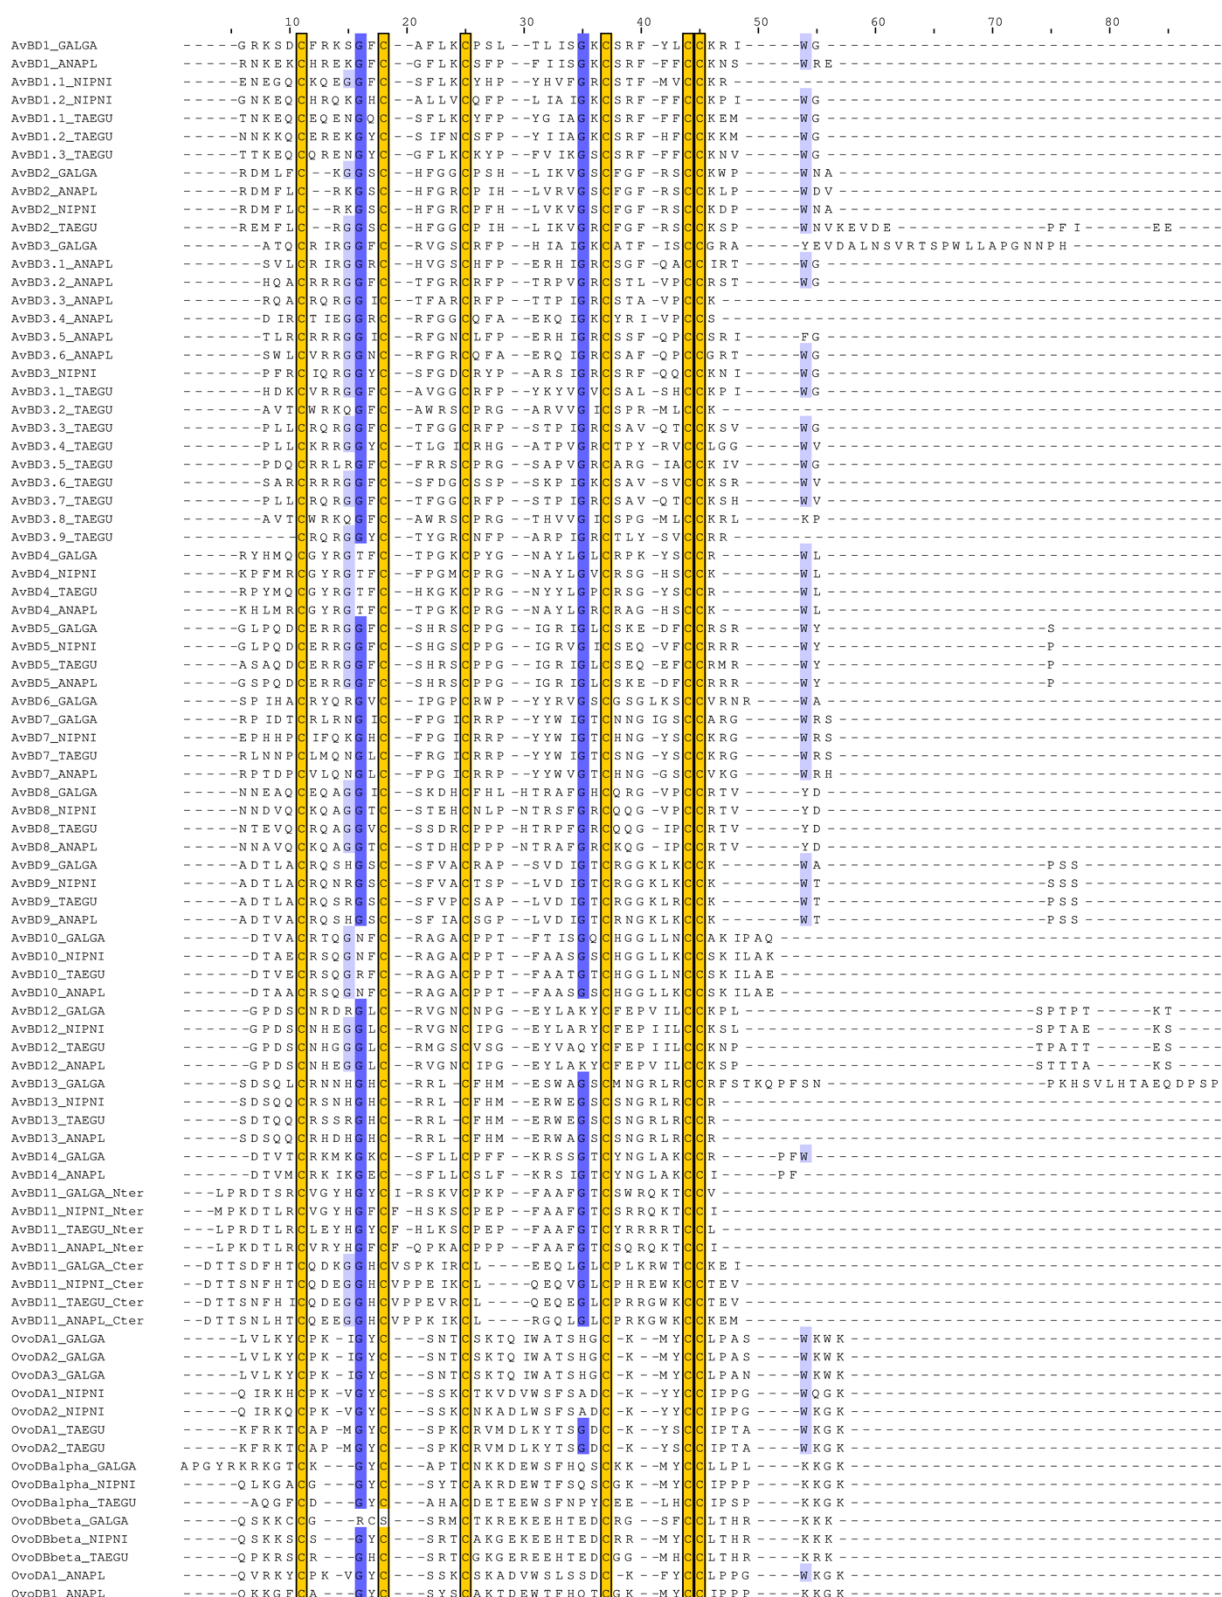

Supplement: s1 [file s1]
